# Supplementary material for: High-density, vertically aligned crystalline CrO2 nanorod arrays derived from chemical vapor deposition assisted by AAO templates
Source: Royal Society of Chemistry journal article supplement (doi:10.1039/b905308e), 2009-01-01
Supplement: b905308e.pdf [file b905308e.pdf]

## Supporting Information

# High-Dense, Vertically Aligned CrO<sub>2</sub> Nanorod Arrays Derived From Chemical Vapor Deposition Assisted by AAO Templates

Qiang Zhao,<sup>a</sup> Gehui Wen,<sup>\*a</sup> Zhigang Liu,<sup>a</sup> Jujun Yuan,<sup>a</sup> Dongmei Li,<sup>a</sup> Guangtian Zou,<sup>a</sup> Rongkun Zheng,<sup>b</sup> Simon P. Ringer<sup>b</sup> and Ho-Kwang Mao<sup>c</sup>

<sup>a</sup>State Key Laboratory of Superhard Materials, Jilin University, Changchun 130012, People's Republic of China

E-mail: phghwen@yahoo.com.cn ; Tel: +86-431-85168211; Fax: +86-431-85168881

<sup>b</sup>Australian Key Centre for Microscopy and Microanalysis, The University of Sydney, NSW 2006, Australia

<sup>c</sup>Geophysical Laboratory, Carnegie Institution of Washington, 5251 Broad Branch Road NW, Washington, DC 20015, USA

### Experiment

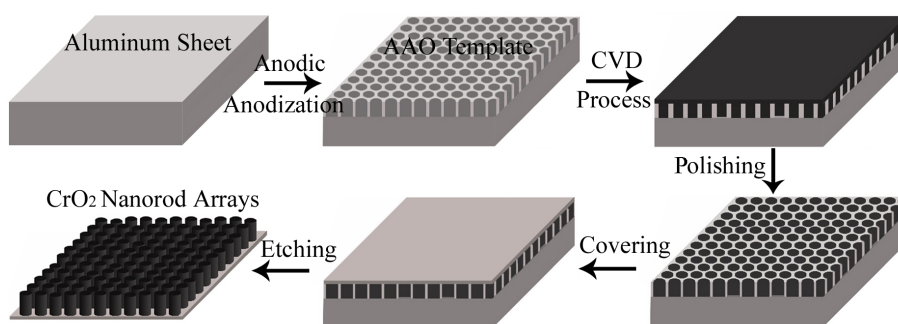

Figure.S1. Schematic of the fabrication of CrO<sub>2</sub> nanorod arrays.

Figure.S1 shows the schematic diagram of the fabrication process of CrO<sub>2</sub> nanorod arrays. AAO templates for CrO<sub>2</sub> deposition were prepared by two-step anodic anodization<sup>1</sup> of aluminum sheet (99.999%) in 0.3 M oxalic acid at a constant voltage of 40 V. Following anodization, the templates were soaked in a phosphoric acid solution (5%) at 30 °C for 30 minutes to enlarge the diameter of the pores. The CVD deposition reactor consists of a quartz tube placed inside a furnace. During the deposition, a 1cm×1cm AAO template was placed vertically in the reaction zone, and CrO<sub>3</sub> (0.5g) was placed in the source zone. The temperature of the AAO template and the precursor was slowly increased to 380 °C and 260°C respectively, and then kept constant. Oxygen was used as carrying gas flowing from the source zone to reaction zone. Sublimed CrO<sub>3</sub> was transported to reaction zone and diffused into the pores of the AAO template where they decomposed into CrO<sub>2</sub> with evolution of O<sub>2</sub>. CrO<sub>2</sub> initially grew along the AAO template pores, and finally overflowed on the surface of the AAO template to yield a continuous CrO<sub>2</sub> layer. After deposition, the overflowed CrO<sub>2</sub> surface layer was mechanically polished away using diamond nanoparticles carefully. And CrO<sub>2</sub> nanorod arrays were got in the AAO template. For XRD and magnetic measurements, epoxy resin was coated on the surface of the AAO template, serving as a protecting and holding layer, and the remanent Al metal on the back of the template was etched in a saturated CuCl<sub>2</sub> solution. While for SEM observation, the AAO template was further dissolved in 10% NaOH solution, and freestanding CrO<sub>2</sub> nanorods were got on the epoxy resin layer.

## TEM Images

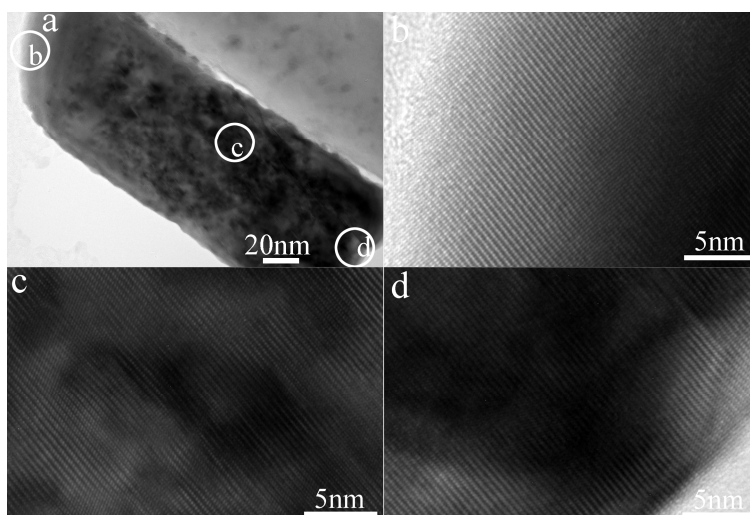

Figure.S2 (a) Low-magnification TEM image of a single  $\text{CrO}_2$  nanorod. (b), (c) and (d) HRTEM images marked in (a). These HRTEM images reveal that the nanorod is a single crystal.

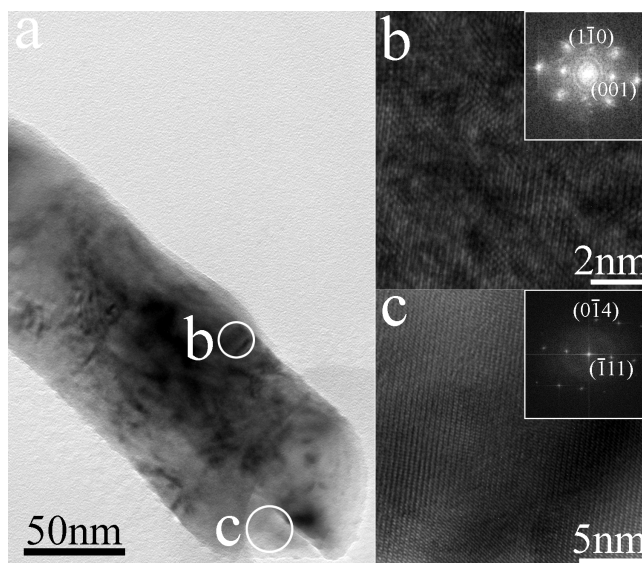

Figure.S3 (a) Low-magnification TEM image of a single  $\text{CrO}_2$  nanorod. (b) and (c) Representative HRTEM images marked in (a), insets show the FFT images of the HRTEM images.

Figure.S3 (a) shows a typical TEM image of  $\text{CrO}_2$  nanorod which has a rhombohedral  $\text{Cr}_2\text{O}_3$  crystal on the top. Figure.S3 (b) shows the HRTEM image marked in (a), the two dimensional fast Fourier transform (FFT) of the lattice-resolved image (inset of the Figure.S3 (b)) indexed to a tetragonal  $\text{CrO}_2$  lattice. Figure.S3 (c) shows the HRTEM image of the rod top (marked in Figure.S3 (a)), the FFT image indexed to a rhombohedral chromic oxide ( $\text{Cr}_2\text{O}_3$ ) lattice.

## Reference

1. Hideki Masuda and Kenji Fukuda, *Science*. 1995, **268**, 1466.
